# Supplementary material
Source: PubMed Central journal article supplement (PMC6867020)
Supplement: HBM-38-2051-s001.pdf [file HBM-38-2051-s001.pdf]

| Subject Code | Age  | Sex    | Education |
|--------------|------|--------|-----------|
| sub01        | 76.3 | male   | 22        |
| sub02        | 45.7 | female | 18        |
| sub03        | 65.3 | male   | 18        |
| sub04        | 74.5 | female | 18        |
| sub05        | 55.5 | female | 16        |
| sub06        | 51.4 | female | 15        |
| sub07        | 64.0 | female | 16        |
| sub08        | 59.1 | male   | 19        |
| sub09        | 54.9 | female | 16        |
| sub10        | 62.3 | male   | 21        |
| sub11        | 65.5 | male   | 16        |
| sub12        | 53.1 | male   | 14        |
| sub13        | 75.1 | male   | 19        |
| sub14        | 57.3 | female | 13        |
| sub15        | 58.4 | female | 18        |
| sub16        | 53.7 | male   | 18        |
| sub17        | 46.0 | male   | 12        |
| sub18        | 59.3 | male   | 12        |
| sub19        | 55.2 | male   | 12        |
| sub20        | 67.1 | male   | 20        |
| sub21        | 63.4 | male   | 20        |
| sub22        | 71.1 | female | 12        |
| sub23        | 58.2 | male   | 18        |
| sub24        | 50.4 | female | 12        |
| sub25        | 49.1 | male   | 18        |
| sub26        | 42.8 | male   | 12        |
| sub27        | 60.5 | female | 12        |
| sub28        | 61.5 | male   | 14        |
| sub29        | 55.6 | male   | 18        |
| sub30        | 48.8 | male   | 16        |
| sub31        | 60.7 | female | 18        |
| sub32        | 78.2 | male   | 17        |

| Edinburgh<br>Handedness | Months Since Stroke | Diagnosis             | WAB AQ |
|-------------------------|---------------------|-----------------------|--------|
| 70                      | 71.55               | conduction            | 82.8   |
| 100                     | 24.47               | conduction            | 76.2   |
| 80                      | 45.86               | Broca's               | 46     |
| 100                     | 5.36                | anomic                | 96.2   |
| 100                     | 19.81               | anomic                | 89.2   |
| 90                      | 4.86                | anomic                | 91.4   |
| -100                    | 25.79               | Broca's               | 45.1   |
| -79                     | 85.51               | anomic                | 92.5   |
| 100                     | 30.16               | transcortical sensory | 60.6   |
| 80                      | 24.9                | Broca's               | 22.8   |
| 100                     | 24.77               | anomic                | 88.8   |
| 16                      | 23.36               | anomic                | 84.9   |
| 100                     | 105.55              | anomic                | 86.9   |
| 70                      | 13.63               | Broca's               | 48.1   |
| 100                     | 12.55               | anomic                | 85.7   |
| -100                    | 28.88               | Broca's               | 28.6   |
| 70                      | 39.52               | Broca's               | 59.5   |
| 50                      | 81.63               | anomic                | 91     |
| 100                     | 23.26               | anomic                | 88.4   |
| 100                     | 23.23               | anomic                | 87.7   |
| 100                     | 135.71              | anomic                | 89.6   |
| 100                     | 11.6                | conduction            | 74.1   |
| 60                      | 140.41              | anomic                | 98.6   |
| 40                      | 34.79               | anomic                | 94.4   |
| 80                      | 7.98                | anomic                | 99.8   |
| 20                      | 10.38               | anomic                | 96.1   |
| 80                      | 56.97               | anomic                | 87.2   |
| 100                     | 37.09               | anomic                | 84.7   |
| 100                     | 68.86               | anomic                | 85.3   |
| 89.5                    | 14.72               | Broca's               | 54.8   |
| 100                     | 34.13               | anomic                | 90.5   |
| -100                    | 151.02              | anomic                | 90.1   |

| WAB Spontaneous<br>Speech | WAB Audio-verbal<br>comprehension | WAB Repetition | WAB Naming/Word<br>Finding |
|---------------------------|-----------------------------------|----------------|----------------------------|
| 18                        | 8.3                               | 6.9            | 8.2                        |
| 14                        | 8.1                               | 6.6            | 9.4                        |
| 9                         | 4.6                               | 3.3            | 6.1                        |
| 19                        | 9.6                               | 9.8            | 9.7                        |
| 18                        | 9.4                               | 8.6            | 8.6                        |
| 8                         | 9.2                               | 8.6            | 9.9                        |
| 7                         | 6.25                              | 4.2            | 3.6                        |
| 9                         | 9.85                              | 9.7            | 7.7                        |
| 13                        | 5.3                               | 8.1            | 3.9                        |
| 3                         | 4.2                               | 2.6            | 1.6                        |
| 8                         | 9.8                               | 7.2            | 9.4                        |
| 19                        | 9.05                              | 8.4            | 6                          |
| 19                        | 8.95                              | 7.1            | 8.4                        |
| 9                         | 6.85                              | 4              | 4.2                        |
| 18                        | 9.65                              | 7.6            | 7.6                        |
| 5                         | 5.1                               | 2              | 2.2                        |
| 12                        | 8.25                              | 5.1            | 4.4                        |
| 18                        | 9                                 | 9.4            | 9.1                        |
| 18                        | 9.6                               | 8.3            | 8.3                        |
| 18                        | 8.45                              | 9.1            | 8.3                        |
| 19                        | 7.4                               | 8.6            | 9.8                        |
| 17                        | 8.55                              | 4.2            | 7.3                        |
| 20                        | 10                                | 9.5            | 9.8                        |
| 19                        | 9                                 | 9.4            | 9.8                        |
| 20                        | 10                                | 10             | 9.9                        |
| 19                        | 9.95                              | 9.6            | 9.5                        |
| 18                        | 9.7                               | 8.4            | 7.5                        |
| 19                        | 7.85                              | 8.2            | 7.3                        |
| 15                        | 8.85                              | 9.5            | 9.3                        |
| 10                        | 7.7                               | 3.6            | 6.1                        |
| 18                        | 9.85                              | 8.8            | 8.6                        |
| 18                        | 9.75                              | 8.7            | 8.6                        |

| Naming Accuracy in<br>the Scanner | PNT |
|-----------------------------------|-----|
| 0.78                              | 41  |
| 1.00                              | 57  |
| 0.84                              | 41  |
| 1.00                              | 56  |
| 0.94                              | 50  |
| 1.00                              | 58  |
| 0.25                              | 15  |
| 0.94                              | 54  |
| 0.31                              | 29  |
| 0.22                              | 4   |
| 1.00                              | 52  |
| 0.34                              | 11  |
| 0.91                              | 54  |
| 0.25                              | 16  |
| 0.72                              | 28  |
| 0.22                              | 1   |
| 0.22                              | 9   |
| 0.94                              | 56  |
| 0.94                              | 51  |
| 1.00                              | 48  |
| 0.97                              | 55  |
| 0.69                              | 39  |
| 0.66                              | 59  |
| 0.84                              | 58  |
| 0.97                              | 58  |
| 1.00                              | 54  |
| 0.59                              | 40  |
| 0.63                              | 46  |
| 0.81                              | 48  |
| 0.56                              | 36  |
| 0.78                              | 54  |
| 0.94                              | 53  |
